# Supplementary material for: Hematite photoanodes prepared by particle transfer for photoelectrochemical water splitting
Source: Royal Society of Chemistry journal article supplement (doi:10.1039/d2se00145d), 2022-01-01
Supplement: d2se00145d1.pdf [file d2se00145d1.pdf]

1                   **Hematite Photoanodes Prepared by Particle Transfer for**  
2                   **Photoelectrochemical Water Splitting**

3

4 Zhenhua Pan,<sup>1\*</sup> Rito Yanagi,<sup>2,3</sup> Tomohiro Higashi,<sup>4</sup> Yuriy Pihosh,<sup>5</sup> Shu Hu,<sup>2,3</sup> Kenji  
5 Katayama<sup>1</sup>

6

7 <sup>1</sup> Department of Applied Chemistry, Faculty of Science and Technology, Chuo University,  
8 1-13-27 Kasuga, Bunkyo, Tokyo 112-8551, Japan

9 <sup>2</sup> Department of Chemical and Environmental Engineering, School of Engineering and  
10 Applied Sciences, Yale University, New Haven, CT 06520, USA.

11 <sup>3</sup> Energy Sciences Institute, Yale West Campus, West Haven, CT 06516, USA.

12 <sup>4</sup> Institute for Tenure Track Promotion, University of Miyazaki, Nishi 1-1 Gakuen-Kibanadai,  
13 Miyazaki 889-2192, Japan

14 <sup>5</sup> University Professors Office, The University of Tokyo, Bunkyo-ku, Tokyo 113-8656, Japan  
15

16 \*Corresponding Author: [zhenhua.20y@g.chuo-u.ac.jp](mailto:zhenhua.20y@g.chuo-u.ac.jp)

17

18

19

20

## 21 **S1 Experimental section**

22 **Preparation of thin-film  $\alpha$ -Fe<sub>2</sub>O<sub>3</sub> photoanodes.** Thin-film  $\alpha$ -Fe<sub>2</sub>O<sub>3</sub> was coated on a  
23 fluorine-doped tin oxide (FTO) quartz substrate ( $\sim 7 \Omega \text{ sq}^{-1}$ , Solaronix) by a solution-derived  
24 method as shown in Figure S1 following a previous study.<sup>1</sup> First,  $\beta$ -FeOOH was grown on  
25 FTO in a solution containing 0.15 M iron (III) chloride hexahydrate (FeCl<sub>3</sub>, Wako Pure  
26 Chemical Industries. Ltd., 99.9%) and 1 M sodium nitrate (NaNO<sub>3</sub>, Wako Pure Chemical  
27 Industries. Ltd., 99.9%) at 100 °C for 2 h. Then,  $\beta$ -FeOOH on FTO was annealed at 500,  
28 600, 700, 800, or 900 °C for 2 h to obtain thin-film  $\alpha$ -Fe<sub>2</sub>O<sub>3</sub> on FTO. Finally, thin-film  $\alpha$ -  
29 Fe<sub>2</sub>O<sub>3</sub> on FTO was connected with a lead wire using indium and used as a photoanode.

30 **Preparation of  $\alpha$ -Fe<sub>2</sub>O<sub>3</sub> particles.**  $\alpha$ -Fe<sub>2</sub>O<sub>3</sub> particles were prepared by a solution-derived  
31 method as shown in Figure S3. First, a 100 mL solution containing 0.15 M iron (III) chloride  
32 hexahydrate (FeCl<sub>3</sub>, Wako Pure Chemical Industries. Ltd., 99.9%) and 1 M sodium nitrate  
33 (NaNO<sub>3</sub>, Wako Pure Chemical Industries. Ltd., 99.9%) was subjected to a thermal treatment  
34 at 100 °C for 2 h to obtain  $\beta$ -FeOOH suspension. The  $\beta$ -FeOOH suspension was filtrated,  
35 washed with sufficient deionized water, and dried at 80 °C overnight. The obtained particles  
36 were annealed at 500, 600, 700, 800, or 900 °C for 2 h to prepare  $\alpha$ -Fe<sub>2</sub>O<sub>3</sub> particles. For  
37 preparing Sn-doped  $\alpha$ -Fe<sub>2</sub>O<sub>3</sub> particles, Tin(IV) chloride pentahydrate (1 mol% of Fe,  
38 SnCl<sub>4</sub>·5H<sub>2</sub>O, FUJIFILM Wako Pure Chemical Corporation, 98.0%) was added to the  
39 precursor solution of  $\beta$ -FeOOH and other procedures were the same as those for  $\alpha$ -Fe<sub>2</sub>O<sub>3</sub>  
40 particles.

41 **Preparation of particulate  $\alpha$ -Fe<sub>2</sub>O<sub>3</sub> photoanodes.** Particulate  $\alpha$ -Fe<sub>2</sub>O<sub>3</sub> photoanodes were  
42 fabricated through a particle-transfer method as shown in Figure S4.<sup>2</sup> Briefly,  $\sim 10$  mg  $\alpha$ -  
43 Fe<sub>2</sub>O<sub>3</sub> particles were suspended in a 450  $\mu\text{L}$  isopropanol solution by sonication. The  
44 suspension of 30  $\mu\text{L}$  was drop-casted on a 1 cm  $\times$  3 cm glass substrate three times. After the  
45 drop-cast glass substrate was fully dried in the air, a conductive layer of Ti with a thickness  
46 of aprox. 2.5  $\mu\text{m}$  was deposited on the  $\alpha$ -Fe<sub>2</sub>O<sub>3</sub> particles by an electron-beam evaporation  
47 (ULVAC, CV-S) to form an ohmic contact with  $\alpha$ -Fe<sub>2</sub>O<sub>3</sub> particles. Another glass substrate  
48 with a conductive carbon tape was used to attach and peel off the Ti film. The transferred Ti

49 film conjugated with  $\alpha$ -Fe<sub>2</sub>O<sub>3</sub> particles was sonicated in water for 10 s to remove the  
50 excessive particles without a direct contact with the Ti film. Finally, the Ti film was  
51 connected with a lead wire using indium solder and unused region was covered by epoxy  
52 resin for insulation. The obtained assembly of  $\alpha$ -Fe<sub>2</sub>O<sub>3</sub>/Ti/glass substrates were used as  
53 photoanodes.

54 **Deposition of cocatalysts on photoanodes.** CoP<sub>i</sub> was loaded by photoelectrochemical  
55 deposition in a 0.1 M KPi buffer solution containing 0.5 mM Co(NO<sub>3</sub>)<sub>3</sub> at pH = 7.2 under  
56 simulated sunlight illumination (PEL-L01, PECCELL, AM 1.5G, 100 mW cm<sup>-2</sup>) at a  
57 potential of 1.05 V<sub>RHE</sub> for 5 min.

58 CoO<sub>x</sub>, FeNiO<sub>x</sub> and CoFeNiO<sub>x</sub> cocatalysts were loaded on  $\alpha$ -Fe<sub>2</sub>O<sub>3</sub> photoanodes by a  
59 dipping method. For loading CoO<sub>x</sub>, a Co-based solution was firstly prepared by mixing cobalt  
60 (II) 2-ethylhexanoate (20  $\mu$ L, Wako) with hexane (10 mL, HPLC grade, Wako). The  $\alpha$ -Fe<sub>2</sub>O<sub>3</sub>  
61 photoanode was dipped into the Co-based solution for 10 s and then dried in the air naturally.  
62 Finally, the photoanode was annealed in air at 140 °C for 45 minutes. For loading FeNiO<sub>x</sub>, a  
63 FeNi-complex solution was firstly prepared by mixing iron (III) 2-ethylhexanoate (10  $\mu$ L,  
64 Wako), nickel (II) 2-ethylhexanoate (10  $\mu$ L, Wako), and hexane (10 mL, HPLC grade,  
65 Wako). The  $\alpha$ -Fe<sub>2</sub>O<sub>3</sub> photoanode was dipped into the FeNi-complex solution for 20 s and  
66 then dried in the air naturally. Finally, the photoanode was annealed in air at 140 °C for 45  
67 minutes. For loading CoFeNiO<sub>x</sub>, a Co-based solution and a FeNi-complex solution were  
68 prepared as mentioned above. The  $\alpha$ -Fe<sub>2</sub>O<sub>3</sub> photoanode was dipped into the FeNi-complex  
69 solution for 10 s, dried in the air, then dipped into Co-based solution for 5 s, and again dried  
70 naturally in the air. This dipping process was repeated twice. Finally, the photoanode was  
71 annealed in air at 140 °C for 45 minutes.

72 A NiCoFeBO<sub>x</sub> cocatalyst was loaded on  $\alpha$ -Fe<sub>2</sub>O<sub>3</sub> photoanodes by a photoelectrochemical  
73 deposition method, following a previous study.<sup>3</sup> A standard three-electrode system was  
74 employed for the deposition, where the  $\alpha$ -Fe<sub>2</sub>O<sub>3</sub> photoanode, a Ag/AgCl electrode, and a Pt  
75 wire were used as the working, reference, and counter electrodes. The electrolyte was a  
76 K<sub>2</sub>B<sub>4</sub>O<sub>7</sub>·4H<sub>2</sub>O buffer solution (0.25 M, pH = 10, 99.99% trace metals basis, Sigma Aldrich)  
77 containing NiSO<sub>4</sub>·6H<sub>2</sub>O (2 mM, 99.99% trace metals basis, Sigma Aldrich), Co(NO<sub>3</sub>)<sub>2</sub>·6H<sub>2</sub>O

78 (0.5 mM, 99.99% trace metals basis, Sigma Aldrich) and  $\text{FeSO}_4 \cdot 7\text{H}_2\text{O}$  (0.8 mM, 99.99%  
79 trace metals basis, Sigma Aldrich). Before deposition, the freshly made solution was stirred  
80 and bubbled by  $\text{N}_2$  gas for  $\sim 25$  min. Then the photoelectrochemical deposition was  
81 conducted at a current density of  $10 \mu\text{A cm}^{-2}$  under AM1.5G simulated solar light for 10 min.  
82 After photo-electrodeposition, the electrode was washed with deionized water and dried by  
83  $\text{N}_2$ .

84

85 **Photoelectrochemical (PEC) and electrochemical impedance spectroscopy**  
86 **measurement.** The PEC activities of photoanodes were measured by a three-electrode  
87 electrochemical configuration in 0.1 M KPi buffer solution at  $\text{pH} = 7.2$  under simulated  
88 sunlight illumination (PEL-L01, PECCELL, AM 1.5G,  $100 \text{ mW cm}^{-2}$ ). Before the  
89 measurement, the electrolyte was purged with  $\text{N}_2$  gas for 20 min. The electrolyte was stirred  
90 and bubbled with  $\text{N}_2$  gas during measurement. An Ag/AgCl electrode in saturated KCl  
91 solution (0.198 V vs. NHE) and a Pt wire were used as the reference and counter electrodes,  
92 respectively. The potential of the working electrode was controlled by a potentiostat  
93 (ALS/CH Instruments, Model 660A) with a scan rate of  $10 \text{ mV s}^{-1}$ . Onset potential ( $E_{\text{on}}$ ) is  
94 defined as the starting potential where the currents in dark and under illumination show a  
95 difference of  $0.01 \text{ mA cm}^{-2}$ . Electrochemical impedance spectroscopy measurements were  
96 performed in the same three-electrode electrochemical configuration for obtaining the Mott-  
97 Schottky (without illumination) and Nyquist plots (under illumination).

98

99 **IPCE measurements.** The incident photon-to-current conversion efficiency (IPCE) was  
100 measured using a MAX-302 Xe light source (Asahi Spectra, Japan) equipped with bandpass  
101 filters to provide monochromatic light. Values of the IPCE were obtained by the following  
102 equation:

$$103 \quad IPCE (\%) = \left[ \left( \frac{1240}{\lambda} \right) \times \frac{J}{P} \right] \times 100,$$

104 where  $\lambda$  (nm) is the wavelength of the monochromatic incident light,  $J$  ( $\text{mA cm}^{-2}$ ) is the  
105 photocurrent density at  $1.23 \text{ V}_{\text{RHE}}$  and  $P$  ( $\text{mW cm}^{-2}$ ) is the power density of the incident light.

106

107 **Characterization.** The X-ray diffraction (XRD) pattern was recorded with a Rigaku  
108 SmartLab diffractometer with Cu K $\alpha$  radiation, operating at 40 kV and 30 mA. The light  
109 absorption spectrum was obtained by a UV-visible-near infrared diffuse-reflectance  
110 spectroscopy (DRS, V-670, JASCO). The Scanning electron microscope (SEM) images were  
111 taken by scanning electron microscopy (Hitachi SU8020).

112

113 **Parallel PEC cell.** A PEC cell with a parallel configuration (parallel PEC cell) was  
114 constructed by connecting a Ga-doped LTCA (Ga-LTCA)-based particulate photocathode  
115 prepared through a particle transfer method<sup>4, 5</sup> and a particulate  $\alpha$ -Fe<sub>2</sub>O<sub>3</sub> photoanode. Prior  
116 to fabricating the parallel PEC cell, surface modifications for the photoelectrodes of Ga-  
117 LTCA and  $\alpha$ -Fe<sub>2</sub>O<sub>3</sub> were conducted. For the Ga-LTCA photocathodes, surface protective  
118 layer of TiO<sub>2</sub> was deposited on the Ga-LTCA surface, subsequently loading of Pt cocatalyst  
119 for promoting H<sub>2</sub> evolution reaction following the previously reported protocol.<sup>3</sup> For the  $\alpha$ -  
120 Fe<sub>2</sub>O<sub>3</sub> photoanodes, CoP<sub>7</sub> cocatalysts for O<sub>2</sub> evolution reaction were loaded on the surface by  
121 photoelectrochemical deposition as mentioned before. Both surface-modified  
122 photoelectrodes were mounted side by side on a glass plate. The PEC water splitting reaction  
123 was conducted in 0.1 M KP<sub>i</sub> buffered aqueous solution (pH = 7.2) in an airtight reactor with  
124 a flat window and a cooling jacket. The reactor was purged with Ar gas and maintained at  
125 atmospheric pressure. The cell was irradiated by a simulated AM1.5G light (XES-70S1, San-  
126 ei electronic). The photocurrent was recorded as the chronoamperogram in the two-electrode  
127 configuration without applying an external bias voltage. The quantities of evolved hydrogen  
128 and oxygen were determined using a micro gas chromatograph (Model 3000, Inficon Co.  
129 Ltd.)

130 Solar-to-hydrogen energy conversion efficiency (STH) of the parallel PEC cell composted  
131 of the  $\alpha$ -Fe<sub>2</sub>O<sub>3</sub> photoanode and the Ga-LTCA photocathode was calculated from the *i-t* curve  
132 of the cell by the following equation:

133  $STH(\%) = J \times 1.23 V \times 100 / P,$

134 where  $J$  is the photocurrent density ( $\text{mA cm}^{-2}$ ), and  $P$  is the power density of the incident  
 135 light, AM1.5G solar simulator ( $100 \text{ mW cm}^{-2}$ ). The effective electrode area of the PEC cell  
 136 was the total effective areas of the  $\alpha\text{-Fe}_2\text{O}_3$  photoanode and the Ga-LTCA photocathode  
 137 used.

138

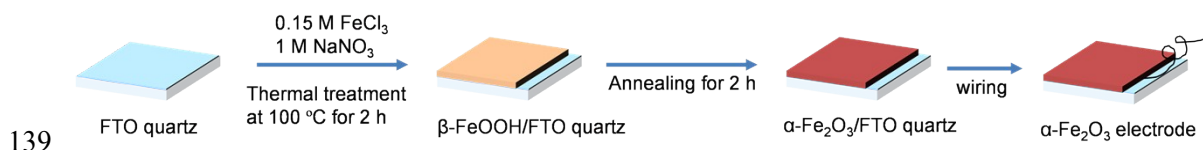

140 Figure S1 Preparation of a thin-film  $\alpha\text{-Fe}_2\text{O}_3$  electrode by a solution-derived method.

141

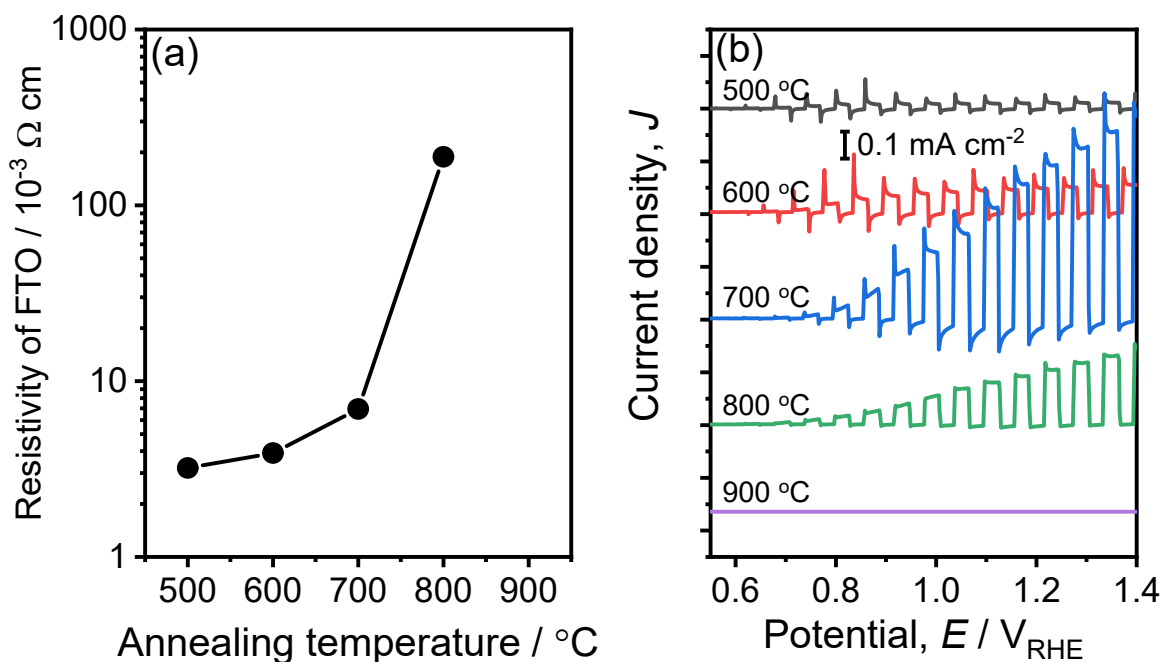

142

143 Figure S2 (a) The resistivities of FTO on quartz after annealing at various temperatures. The  
 144 resistivity of FTO after annealing at  $900\text{ }^\circ\text{C}$  is higher than the detection limit. The thickness  
 145 of FTO is  $500\text{ nm}$ . (b) The PEC activities of  $\text{CoPi}$ -loaded  $\alpha\text{-Fe}_2\text{O}_3\text{/FTO}$  were obtained at  
 146 various annealing temperatures. Electrolyte,  $0.1\text{ M}$  phosphate buffer ( $\text{pH } 7.2$ ); light source,  
 147 solar simulator AM1.5G,  $100\text{ mW cm}^{-2}$ . Thin-film  $\alpha\text{-Fe}_2\text{O}_3$  photoanodes with FTO quartz  
 148 were fabricated at various annealing temperatures by a solution-derived method (Figure S1).

149 At above 700 °C, the electric conductivity of FTO significantly decreased (Figure S2a). Since  
 150 the electron transfer to the substrate was inhibited, the  $\alpha$ -Fe<sub>2</sub>O<sub>3</sub> photoanodes prepared at  
 151 above 800 °C showed poorer PEC performance than those prepared at lower temperatures  
 152 (Figure S2b), even though the former may exhibit superior optoelectronics for photocatalysis.  
 153  
 154

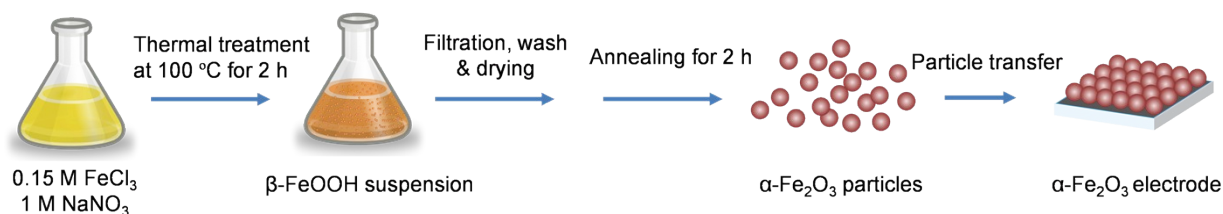

155

156 Figure S3 Fabrication of  $\alpha$ -Fe<sub>2</sub>O<sub>3</sub> particles by a solution-derived method.

157

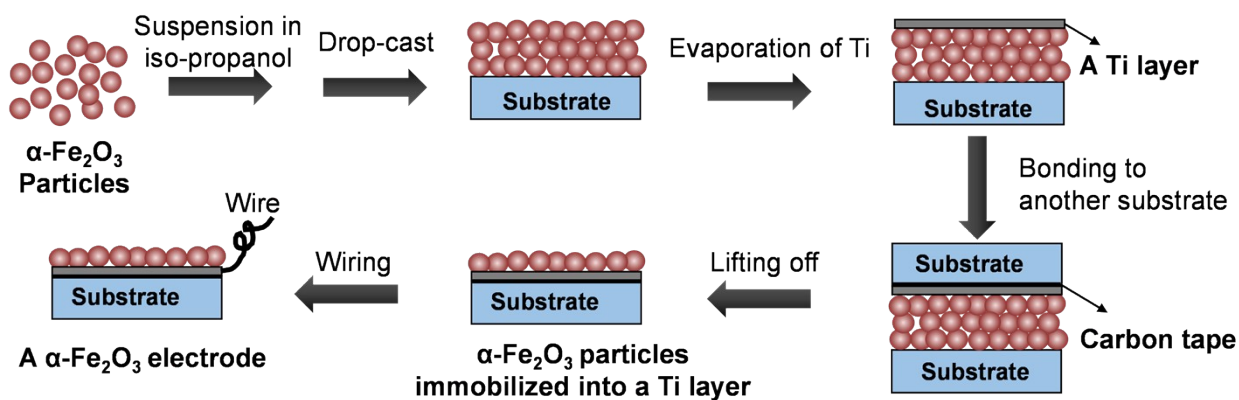

158

159 Figure S4 A particle-transfer method for fabricating a particulate  $\alpha$ -Fe<sub>2</sub>O<sub>3</sub> electrode.

160

161

162

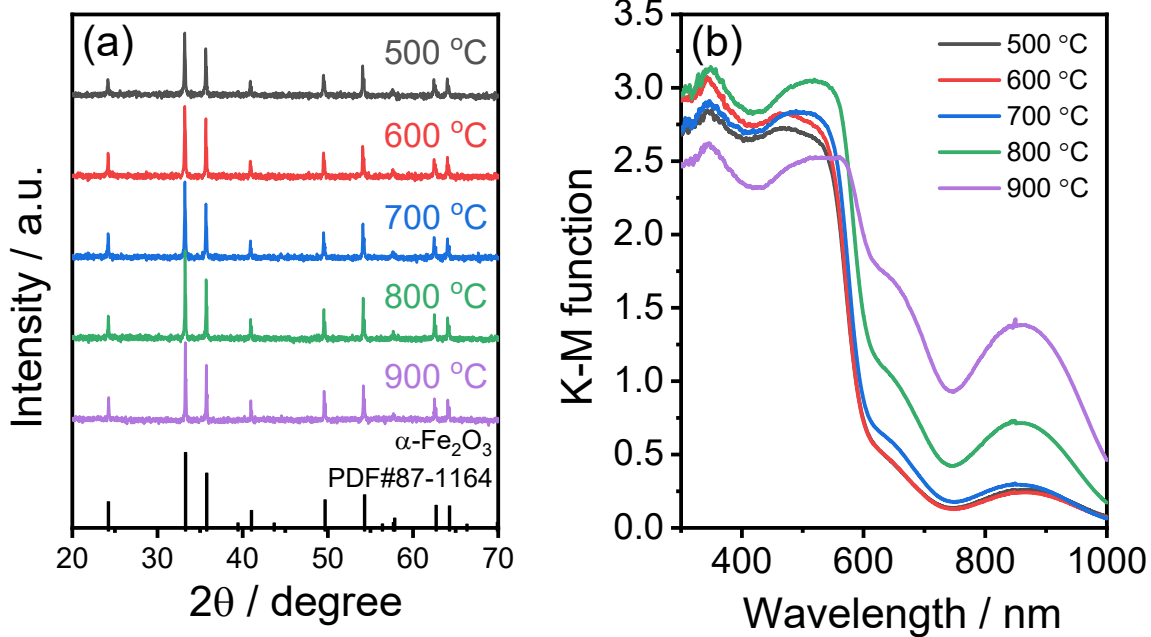

163

164 Figure S5 (a) XRD patterns and (b) DRS of  $\alpha\text{-Fe}_2\text{O}_3$  particles prepared at various annealing  
165 temperatures.

166



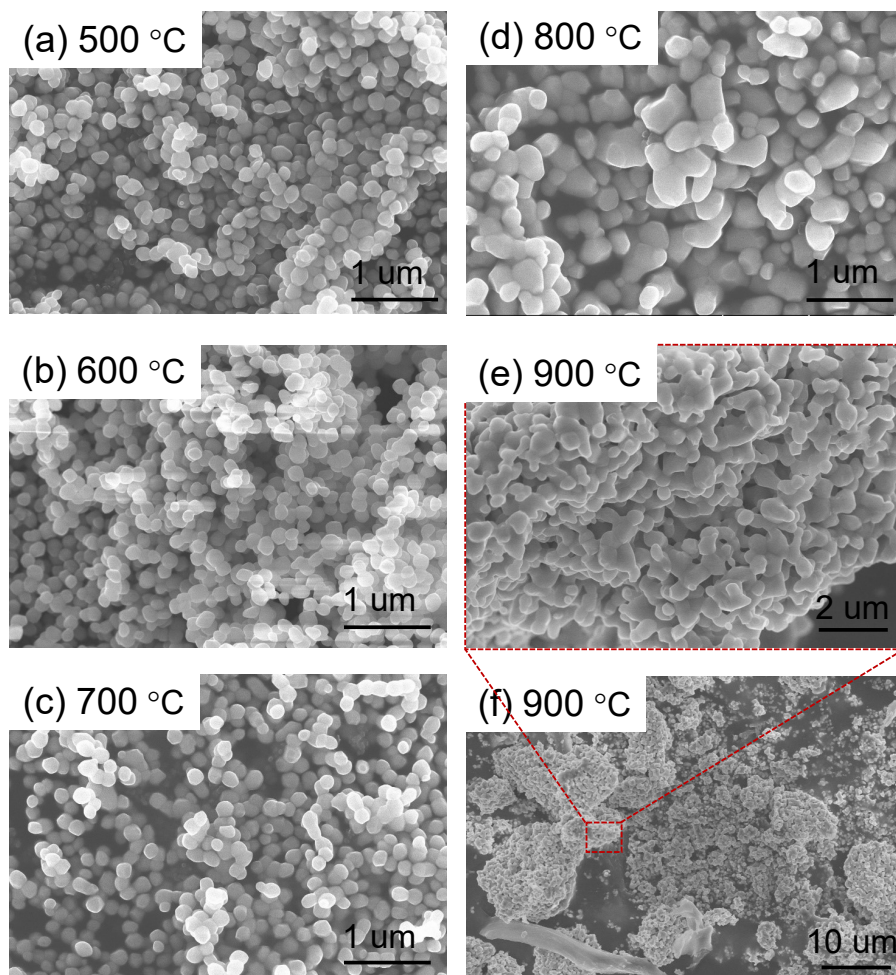

167

168 Figure S6 SEM images of  $\alpha$ - $\text{Fe}_2\text{O}_3$  particles prepared at various annealing temperatures.

169

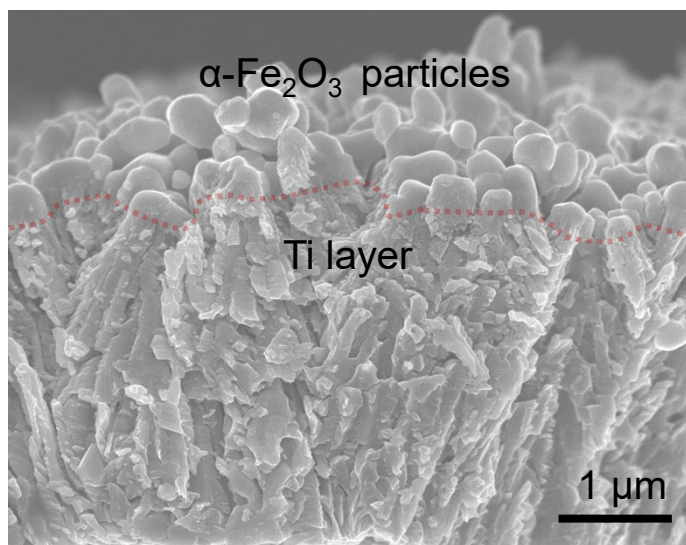

170

171 Figure S7 A SEM image of  $\alpha\text{-Fe}_2\text{O}_3$  particles immobilized on a Ti layer. The dotted line  
 172 indicates the interface between  $\alpha\text{-Fe}_2\text{O}_3$  particles and the Ti layer.

173

174

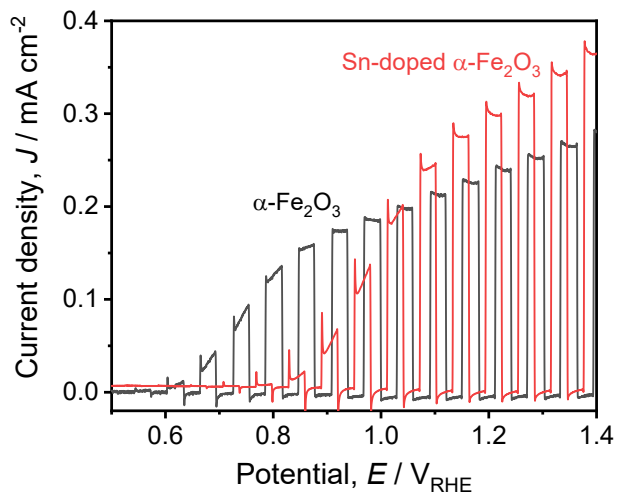

175

176 Figure S8 The PEC activities of  $\alpha\text{-Fe}_2\text{O}_3(800\text{ }^\circ\text{C})$  and Sn-doped  $\alpha\text{-Fe}_2\text{O}_3(800\text{ }^\circ\text{C})$   
 177 photoanodes. Cocatalyst,  $\text{CoP}_i$  loaded by photoelectrochemical deposition; electrolyte, 0.1  
 178 M phosphate buffer (pH 7.2); light source, solar simulator AM1.5G,  $100\text{ mW cm}^{-2}$ .

179

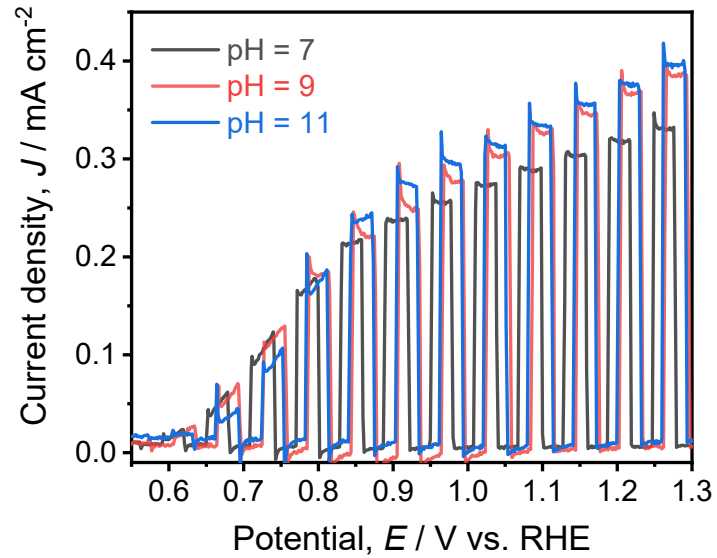

180

181 Figure S9 The PEC activities of a  $\alpha$ - $\text{Fe}_2\text{O}_3$ (800 °C) photoanode at pH 7, 9 and 11. Cocatalyst,  
182  $\text{CoP}_i$  loaded by photoelectrochemical deposition; electrolyte, 0.1 M phosphate buffer (pH  
183 7.2); light source, solar simulator AM1.5G,  $100 \text{ mW cm}^{-2}$ .

184

185

186

187

188

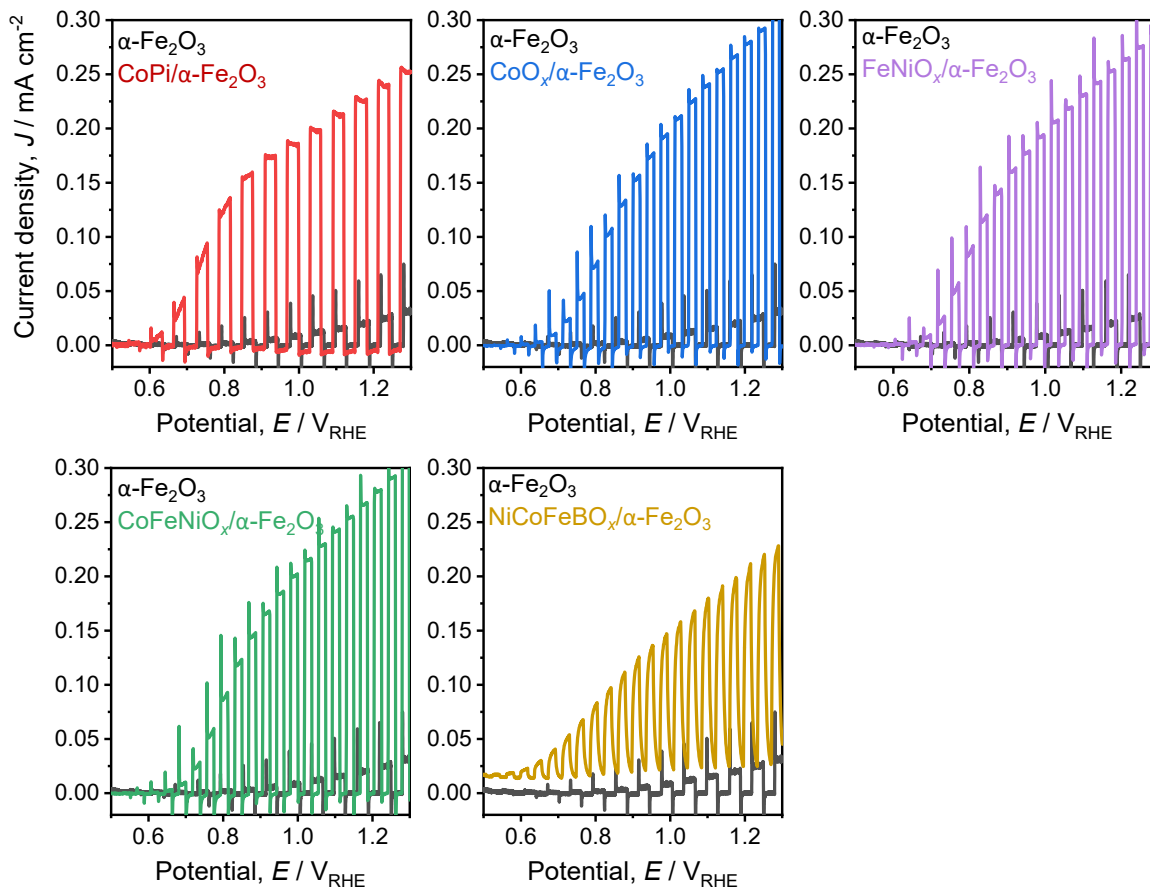

189

190 Figure S10 The PEC activities of  $\alpha\text{-Fe}_2\text{O}_3$ (900 °C) photoanodes loaded with various  
 191 cocatalysts. Electrolyte, 0.1 M phosphate buffer (pH 7.2); light source, solar simulator  
 192 AM1.5G, 100  $\text{mW cm}^{-2}$ .

193

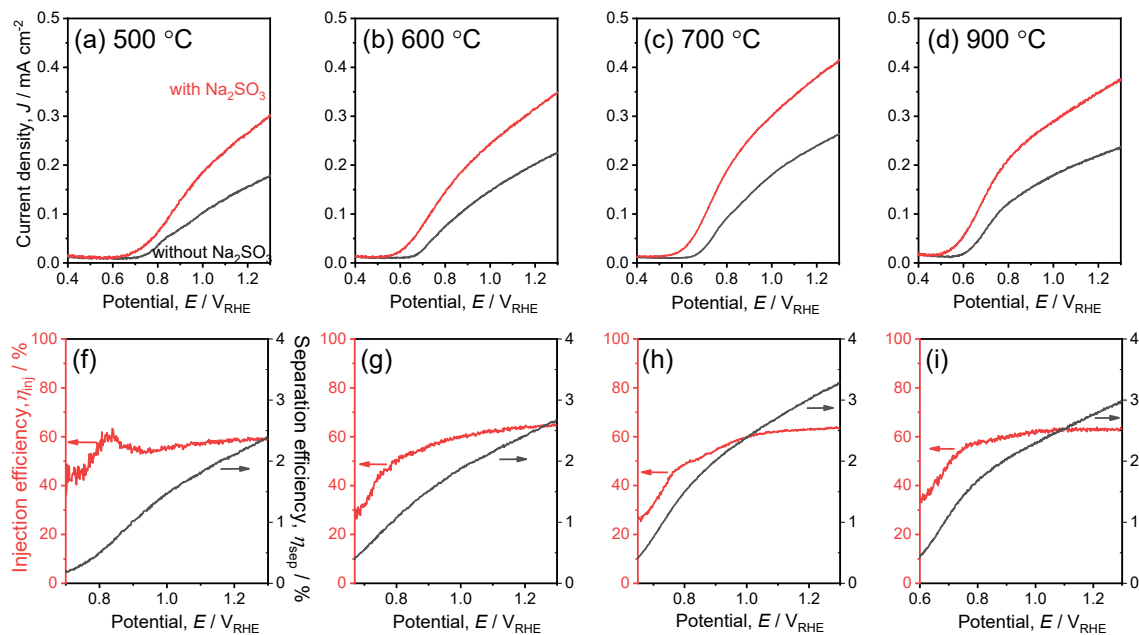

194

195 Figure S11 (a-d) The PEC activities of  $\alpha$ -Fe<sub>2</sub>O<sub>3</sub>(500, 600, 700 and 900 °C) photoanodes with  
 196 and without Na<sub>2</sub>SO<sub>3</sub>. (f-i) The  $\eta_{sep}$  and  $\eta_{inj}$  of  $\alpha$ -Fe<sub>2</sub>O<sub>3</sub>(500, 600, 700 and 900 °C)  
 197 photoanodes. Cocatalyst, CoP<sub>i</sub> loaded by photoelectrochemical deposition; electrolyte, 0.1  
 198 M phosphate buffer (pH 7.2), if a hole scavenger is applied, with additional 0.2 M Na<sub>2</sub>SO<sub>3</sub>;  
 199 light source, solar simulator AM1.5G, 100 mW cm<sup>-2</sup>.

200

## 201 S2 Simulation section

### 202 S2.1 Optical simulation:

203 Optical simulation was carried out using COMSOL Multiphysics with a wave optics  
 204 module. The overall model was set to be glass/water/hematite/Ti according to experimental  
 205 conditions. The refractive index  $n$  for glass, water, and Ti were set to be 1.47, 1.33, and 2.6,  
 206 respectively. The extinction coefficient  $k$  for glass, water, and Ti were set to be 0.

207 The thickness of the  $\alpha$ -Fe<sub>2</sub>O<sub>3</sub> layer was set to be 600 nm according to the main text. The  
 208 refractive index  $n(\lambda)$  and extinction coefficient  $k(\lambda)$  of  $\alpha$ -Fe<sub>2</sub>O<sub>3</sub> are taken from literature and  
 209 shown in Figure S12a.<sup>6</sup> The  $n(\lambda)$  and  $k(\lambda)$  of  $\alpha$ -Fe<sub>2</sub>O<sub>3</sub> serve as input in the simulation. The  
 210 optical metrics consisting of absorption, reflection loss, and transmission loss were simulated  
 211 based on this input and shown in Figure S12b.

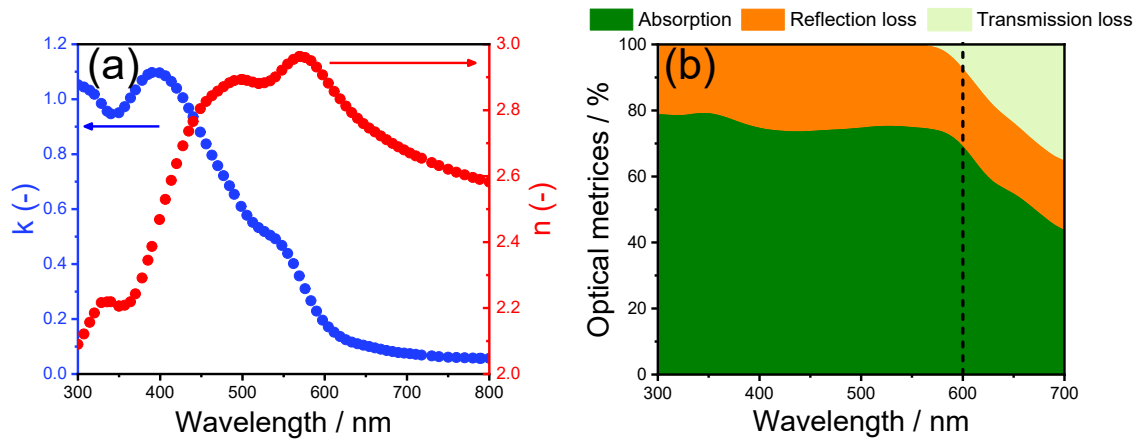

212

213 Figure S12 (a) The refractive index  $n(\lambda)$  and extinction coefficient  $k(\lambda)$  of  $\alpha\text{-Fe}_2\text{O}_3$ . (b)

214 Simulated optical metrics accounting for absorption, reflection loss, and transmission loss

215 based on the  $n(\lambda)$  and  $k(\lambda)$ .

216

217

218

219

220 **S2.2 Generation rate calculation:**

221 The AM1.5G solar spectrum is shown in Figure S13a. The energy of a single photon  
 222  $E$  is expressed as:

$$E = \frac{hc}{\lambda},$$

223  
 224 where  $h$  is Planck constant,  $c$  is speed of light, and  $\lambda$  is wavelength. Using this equation, the  
 225 AM1.5G solar spectrum was converted to photon flux at electrode surface,  $N_0(\lambda)$ , as shown  
 226 in Figure S13b. Subsequently, penetration depth ( $y$ ) and wavelength ( $\lambda$ ) dependent  
 227 generation rate  $G(y,\lambda)$  can be expressed as:

$$G(y,\lambda) = \alpha(\lambda)N_0(\lambda)e^{-\alpha(\lambda)y},$$

228  
 229 where  $\alpha(\lambda)$  is the wavelength dependent absorption coefficient. Then  $\alpha(\lambda)$  can be expressed  
 230 using the extinction coefficient  $k(\lambda)$  as follows:

$$\alpha(\lambda) = \frac{4\pi k(\lambda)}{\lambda}$$

231  
 232 Therefore,  $G(y,\lambda)$  can be expressed with  $k(\lambda)$ :

$$G(y,\lambda) = \frac{4\pi}{\lambda}k(\lambda)N_0(\lambda)e^{-\frac{4\pi}{\lambda}k(\lambda)y}$$

233  
 234 Finally, the generation rate at a specific  $y$ ,  $G(y)$ , is obtained by integrating over the  
 235 wavelength up to the absorption edge of 600 nm. The calculated  $G(y)$  profile is shown in  
 236 Figure S13c.

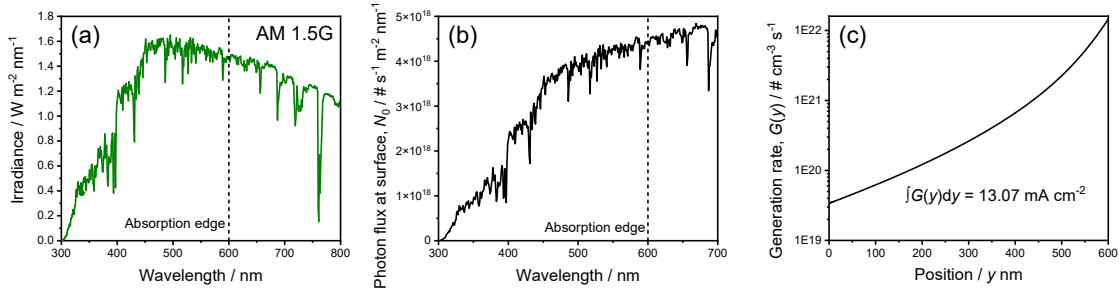

237  
 238 Figure S13 (a) AM 1.5G solar spectrum. (b) Photon flux at electrode surface. (c) Position-  
 239 dependent generation rate.





241 **S2.3 Electrical simulation:**

242 Electrical simulation was carried out using COMSOL Multiphysics with a semiconductor  
243 module. The geometry was set to 1D and hematite was set to be 600 nm in thickness. Back  
244 contact was set to be an ideal ohmic contact, while the liquid contact was set to be a Schottky  
245 contact with varying built-in potentials. Potentials were applied to the hematite through the  
246 back contact. The applied potential  $E(V)$  was converted to the potential  $E(V_{RHE})$  scale using  
247 the following equation:

248 
$$E(V_{RHE}) = 0.47 + E(V)$$

249 The charge-carrier generation rate was calculated based on the AM 1.5G solar spectrum and  
250 the absorption coefficient of  $\alpha\text{-Fe}_2\text{O}_3$ , as described in the previous section. Recombination  
251 was modeled using trap-assisted Shockley-Read-Hall recombination with various carrier  
252 lifetimes.

253 To introduce a series resistance, the  $\alpha\text{-Fe}_2\text{O}_3$  photoanode was connected to a circuit using  
254 the AC/DC module of COMSOL. Ground, resistor, and a voltage source were introduced  
255 into the circuit as shown in Figure S15.

256

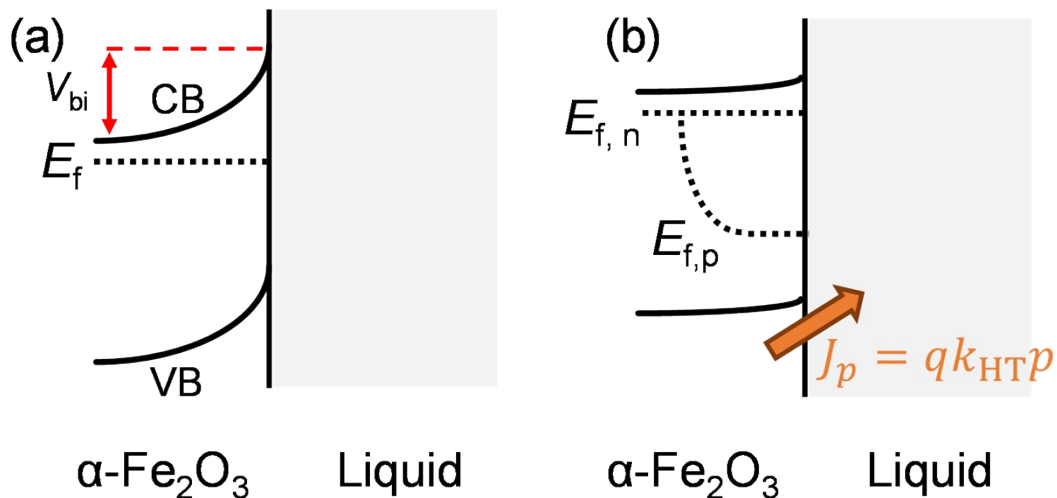

257

258 Figure S14 (a) The band energetics of a  $\alpha\text{-Fe}_2\text{O}_3$ /liquid interface under equilibrium in the  
259 dark.  $V_{bi}$  is the built-in potential at the liquid interface under equilibrium; CB is conduction  
260 band; VB is valence band;  $E_f$  is the Fermi level of  $\alpha\text{-Fe}_2\text{O}_3$ . (b) The band energetics of a-

261  $\text{Fe}_2\text{O}_3$ /liquid interface under equilibrium under illumination.  $E_{f, n}$  and  $E_{f, p}$  are the electron-  
262 and hole- quasi-Fermi level of  $\alpha\text{-Fe}_2\text{O}_3$ , respectively;  $J_p$  is the hole current density from  $\alpha\text{-}$   
263  $\text{Fe}_2\text{O}_3$  to liquid;  $p$  is surface hole concentration;  $k_{HT}$  is hole transfer rate constant and is termed  
264 as “surface recombination velocity” in COMSOL software.

265

266

267

268

269

270

271

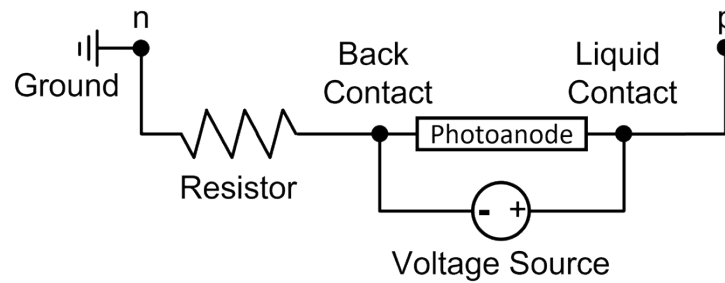

272 Figure S15. Settings for the AC/DC module according to the equivalent circuit.

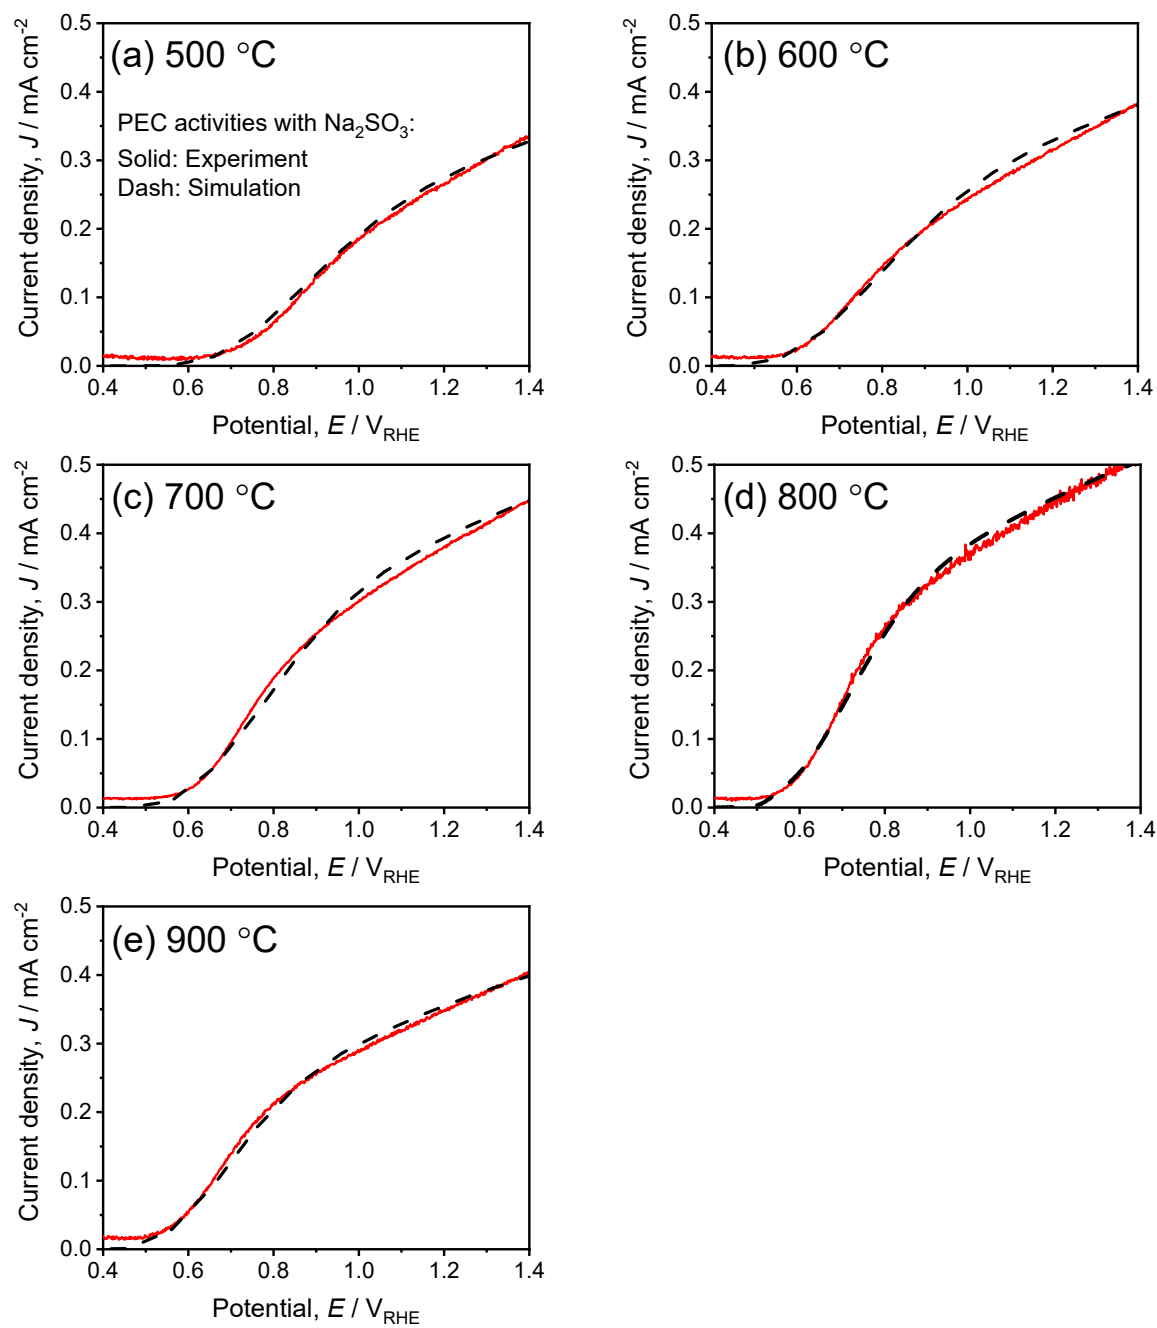

273

274 Figure S16 Experimental and simulated  $J$ - $E$  curves of  $\alpha$ - $\text{Fe}_2\text{O}_3$ (500, 600, 700, 800 and 900  
 275 °C) photoanodes for sulfite oxidation.

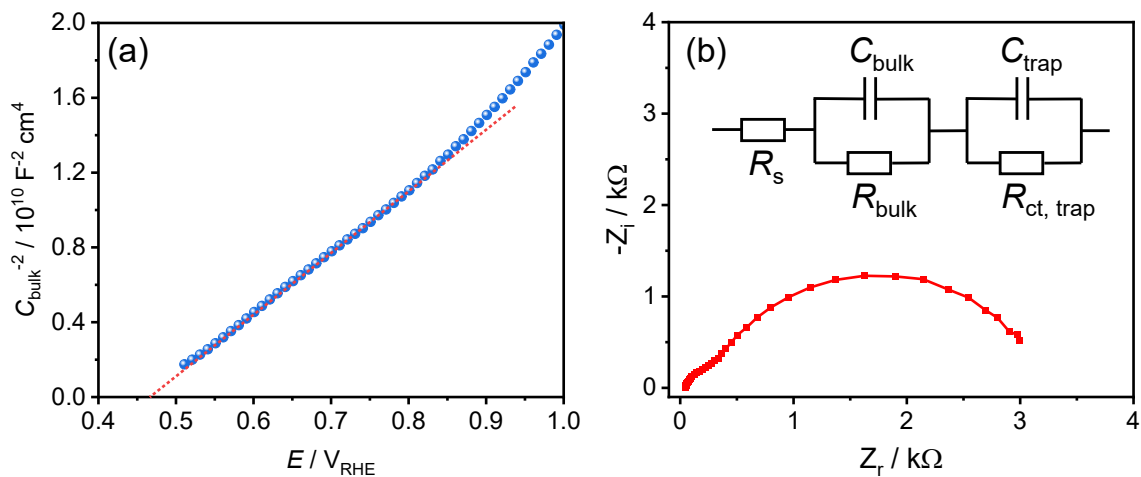

276

277 Figure S17 (a) Mott-Schottky plot for a  $\alpha$ -Fe<sub>2</sub>O<sub>3</sub> photoanode. The impedance spectra were  
 278 recorded at a frequency of 1000 Hz. The  $n$ -type doping density of  $\alpha$ -Fe<sub>2</sub>O<sub>3</sub> was calculated  
 279 from the slope of the plot and its value is  $1 \times 10^{20} \text{ cm}^{-3}$ . (b) Nyquist plot of a CoP/ $\alpha$ -Fe<sub>2</sub>O<sub>3</sub>  
 280 photoanode at 1.0 V<sub>RHE</sub> under illumination and its equivalent circuit used for fitting.  $R_s$ ,  $R_{\text{bulk}}$ ,  
 281 and  $R_{\text{ct, trap}}$  represent the series resistance in the circuit, resistance for charge transfer in bulk  
 282 and resistance for charge transfer from surface states across interface for O<sub>2</sub> evolution,  
 283 respectively. By fitting,  $R_s$ ,  $R_{\text{bulk}}$ ,  $R_{\text{ct, trap}}$  were confirmed to be 48, 414, and 2438  $\Omega$ ,  
 284 respectively. The series resistance applied to simulation in Figure 2d is equal to the sum of  
 285  $R_s$  and  $R_{\text{bulk}}$ . Note that the samples used for these measurements are thin-film  $\alpha$ -Fe<sub>2</sub>O<sub>3</sub>  
 286 photoanodes rather than particulate  $\alpha$ -Fe<sub>2</sub>O<sub>3</sub> photoanodes since the rough surface of the latter  
 287 will disturb the measurements. The thin-film  $\alpha$ -Fe<sub>2</sub>O<sub>3</sub> photoanodes were prepared at the same  
 288 conditions as the particulate  $\alpha$ -Fe<sub>2</sub>O<sub>3</sub> photoanodes.

289

290

291 Table S1 Material parameters employed for electrical simulations

| Parameters                                                                                   | Values                                            |
|----------------------------------------------------------------------------------------------|---------------------------------------------------|
| Energy band gap, $E_g$                                                                       | 2.1 eV                                            |
| Conduction band minimum, $E_c$                                                               | 0.3 V <sub>RHE</sub>                              |
| Effective density of states for conduction and valence energy bands <sup>a</sup> , $N_{c,v}$ | $10^{23} \text{ cm}^{-3}$                         |
| Flat band potential <sup>b</sup> , $E_{\text{FB}}$                                           | 0.47 V <sub>RHE</sub>                             |
| <i>n</i> -type doping density <sup>b</sup> , $N_d$                                           | $1 \times 10^{20} \text{ cm}^{-3}$                |
| Dielectric constant <sup>7</sup> , $\epsilon$                                                | 32                                                |
| Electron mobility <sup>8</sup> , $\mu_n$                                                     | $0.01 \text{ cm}^2 \text{ V}^{-1} \text{ s}^{-1}$ |
| Electrical conductivity <sup>8</sup> , $\sigma$                                              | $10^{-14} \Omega^{-1} \text{ cm}^{-1}$            |
| Hole diffusion length <sup>8</sup> , $L_D$                                                   | 4 nm                                              |

292 <sup>a</sup> $N_{c,v}$  was estimated based on  $E_c$ ,  $E_{\text{FB}}$  and  $N_d$ .

293 <sup>b</sup> $E_{\text{FB}}$  and  $N_d$  were extrapolated from Mott-Schottky plots in Figure S17a.

294

295 Table S2 Material parameters extracted from electrical simulations for  $\alpha$ -Fe<sub>2</sub>O<sub>3</sub> photoanodes

296 prepared at various temperatures

|        | Carrier lifetime / ps | Built-in potential at liquid interface under equilibrium / eV | Series resistance / $\Omega$ | Surface recombination velocity / $\text{cm s}^{-1}$ |
|--------|-----------------------|---------------------------------------------------------------|------------------------------|-----------------------------------------------------|
| 500 °C | 2.6                   | 0.69                                                          | 1200                         | $10^{-4}$                                           |
| 600 °C | 3.0                   | 0.77                                                          | 1100                         | $10^{-4}$                                           |
| 700 °C | 3.7                   | 0.75                                                          | 800                          | $10^{-4}$                                           |
| 800 °C | 4.1                   | 0.78                                                          | 580                          | $10^{-4}$                                           |
| 900 °C | 2.7                   | 0.82                                                          | 750                          | $10^{-4}$                                           |

297

298

299

300

301

302 **Reference**

303

- 304 1. J.-W. Jang, C. Du, Y. Ye, Y. Lin, X. Yao, J. Thorne, E. Liu, G. McMahon, J. Zhu, A. Javey,  
305 J. Guo and D. Wang, *Nat Commun*, 2015, **6**, 7447.
- 306 2. T. Minegishi, N. Nishimura, J. Kubota and K. Domen, *Chem. Sci.*, 2013, **4**, 1120-1124.
- 307 3. Y. Xiao, C. Feng, J. Fu, F. Wang, C. Li, V. F. Kunzelmann, C.-M. Jiang, M. Nakabayashi,  
308 N. Shibata, I. D. Sharp, K. Domen and Y. Li, *Nat. Catal.*, 2020, **3**, 932-940.
- 309 4. J. Liu, T. Hisatomi, G. Ma, A. Iwanaga, T. Minegishi, Y. Moriya, M. Katayama, J. Kubota  
310 and K. Domen, *Energy Environ. Sci.*, 2014, **7**, 2239-2242.
- 311 5. J. Liu, T. Hisatomi, M. Katayama, T. Minegishi, J. Kubota and K. Domen, *J. Mater. Chem.*  
312 *A*, 2016, **4**, 4848-4854.
- 313 6. <https://refractiveindex.info/?shelf=main&book=Fe2O3&page=Query-o>.
- 314 7. B. Klahr, S. Gimenez, F. Fabregat-Santiago, T. Hamann and J. Bisquert, *J. Am. Chem. Soc.*,  
315 2012, **134**, 4294-4302.
- 316 8. K. Sivula, F. Le Formal and M. Grätzel, *ChemSusChem*, 2011, **4**, 432-449.

317
